# Supplementary material
Source: PubMed Central journal article supplement (PMC9221000)

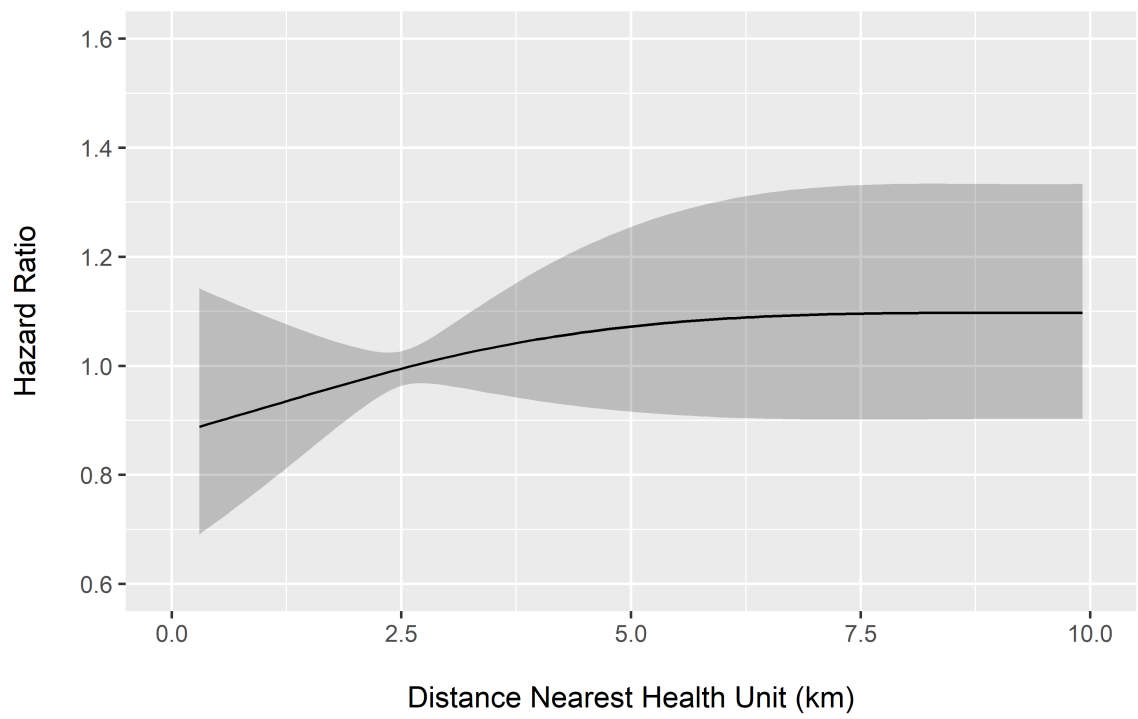

Supplement: NIHMS1814551-supplement-Supplement_Figure.pdf [file NIHMS1814551-supplement-Supplement_Figure.pdf]
